# Supplementary material for: A natural multifunction and multiscale hierarchical matrix as a drug-eluting scaffold for biomedical applications
Source: Royal Society of Chemistry journal article supplement (doi:10.1039/d4tb00482e), 2024-01-01
Supplement: d4tb00482e1.pdf [file d4tb00482e1.pdf]

Supporting informations

# A natural multifunction and multiscale hierarchical matrix as a drug-eluting scaffold for biomedical applications

Gabriela Graziani,<sup>1,1,§</sup> Carla Triunfo,<sup>1,2</sup> Giulia Magnabosco,<sup>1,2,&</sup> Simona Fermani,<sup>2,3</sup> Devis Montroni,<sup>2</sup> Daniele Ghezzi,<sup>4</sup> Martina Cappelletti,<sup>4</sup> Nicola Baldini,<sup>\*,1,5</sup> Giuseppe Falini<sup>\*,2</sup>

<sup>1</sup>Biomedical Science, Technologies, and Nanobiotechnology Lab, IRCCS Istituto Ortopedico Rizzoli, Bologna, Italy.

<sup>2</sup>Department of Chemistry “Giacomo Ciamician”, University of Bologna, Bologna, Italy. <sup>3</sup>Interdepartmental Centre for Industrial Research Health Sciences & Technologies, University of Bologna, 40064 Bologna, Italy. <sup>4</sup>Department of Pharmacy and Biotechnology, University of Bologna, Bologna, Italy. <sup>5</sup>University of Bologna, Department of Biomedical and Neuromotor Sciences, Bologna, Italy.

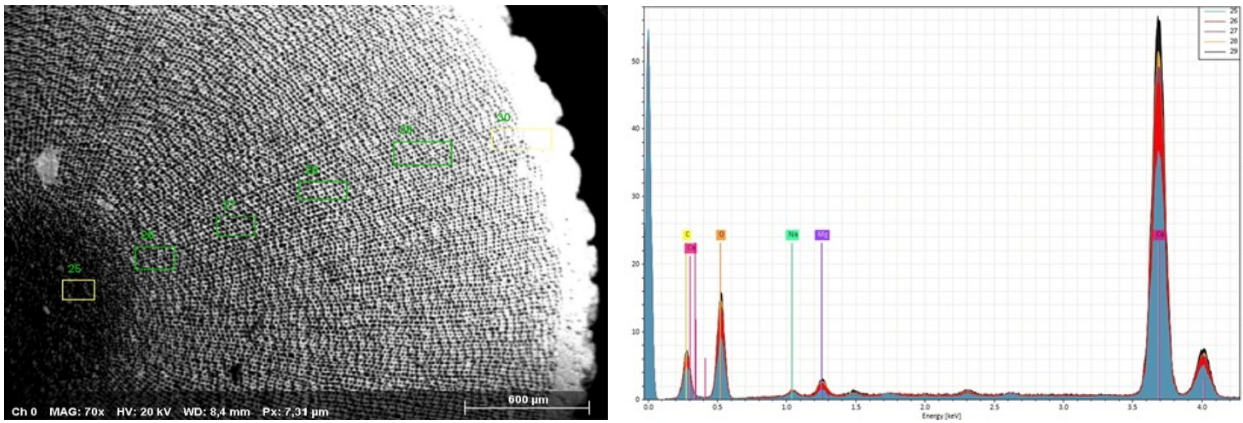

**Figure S11.** (left) Scanning electron microscopy image using back scattered signal. The squares indicate the regions where EDX spectra were collected. (right) EDX spectra from the squares indicated in the left image.

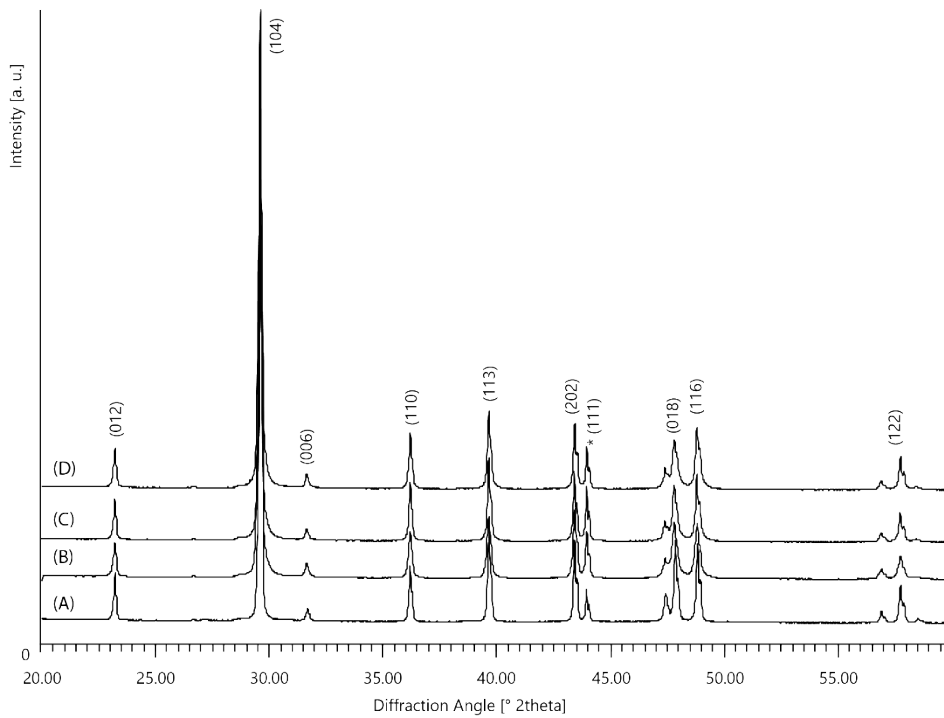

**Figure S12.** X-ray diffraction patterns of powders from *P. imperialis* spines before (A) and after thermal treatment at 250  $^{\circ}$ C for 8 hours (B), 24 hours (C) and 48 hours (D). Only Mag-calcite was detected. The \* symbol indicates the diffraction peak of diamond, which was added as an internal standard. The Miller indices of calcite are reported.

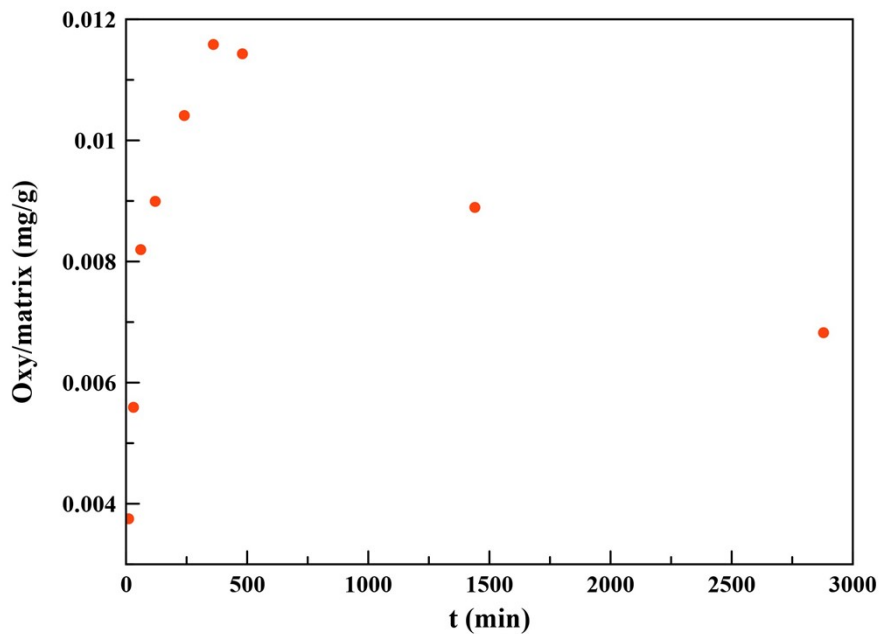

**Figure SI3.** Isotherm of the desorption kinetics of oxytetracycline from thermally treated sea urchin spines in a PBS solution. The samples were kept in dark conditions to minimize the potential for photodegradation.

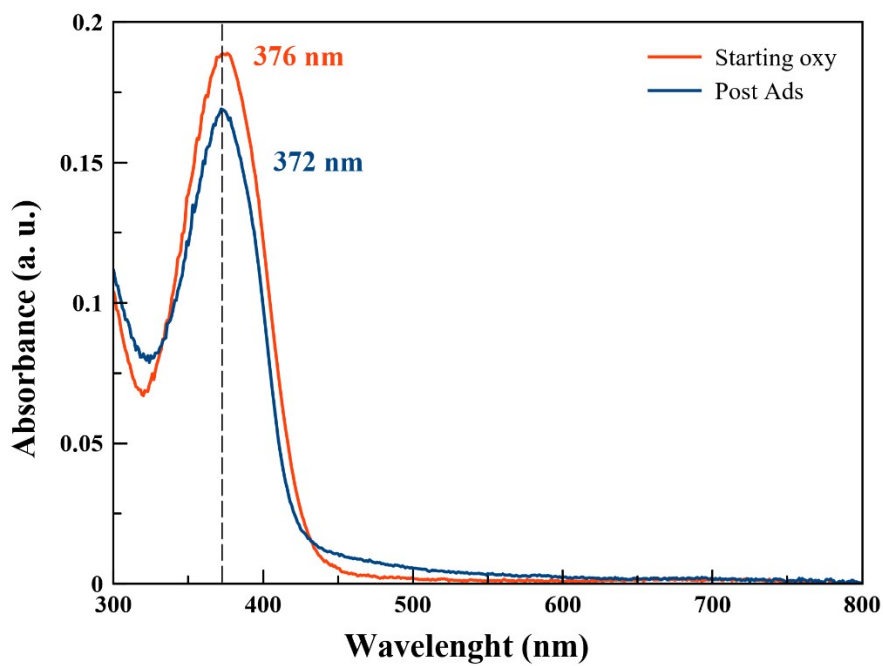

**Figure SI4.** Visible absorption spectrum of oxytetracycline in PBS before (red line) and after (blue line) adsorption on the sea urchin spine matrix. The profile of the adsorption band remains unchanged.

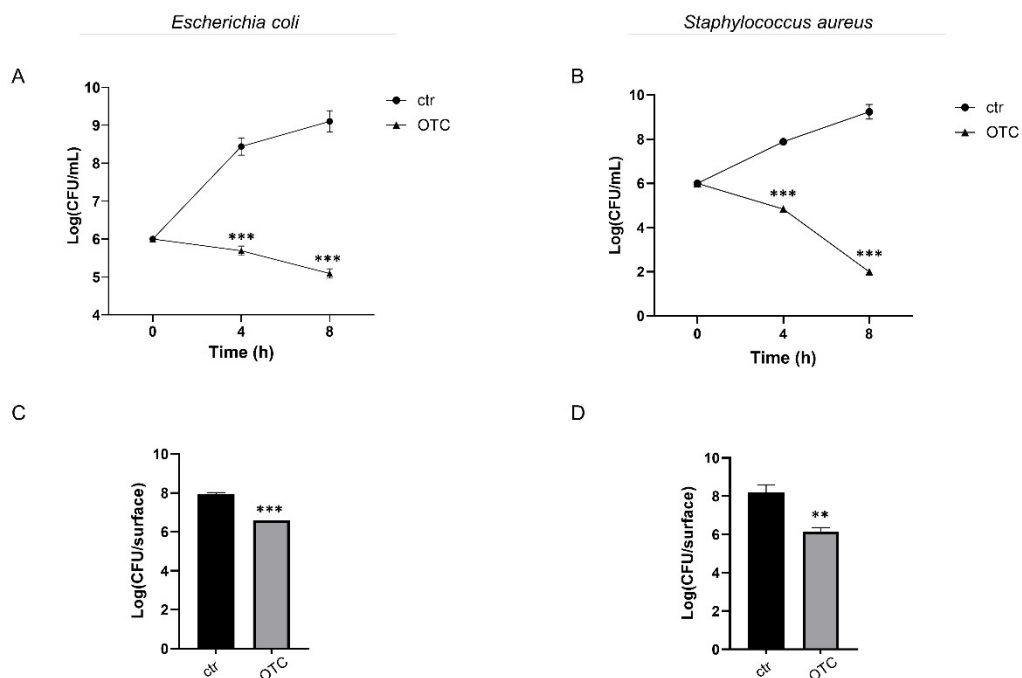

**Figure SI5.** Planktonic growth and adhesion capacity of *Escherichia coli* ATCC 8739 (panels A and C) and *Staphylococcus aureus* ATCC 6538P (panels B and D) inoculated in the culture medium added with oxytetracycline at the same concentration used to load the sea urchin spines. Significance is indicated as follows: \*\*  $p < 0.01$  and \*\*\*  $p < 0.001$ .

**Table SI1.** The crystallographic lattice parameters of Mg-calcite of *P. imperialis* samples measured after being thermally treated at 250 °C for different lengths of time. The quantity of amorphous calcium carbonate (ACC) present was also reported.

| Sample | a-axis<br>(nm)         | c-axis<br>(nm)      | ACC<br>(wt %) |
|--------|------------------------|---------------------|---------------|
| 0 h    | $0.49629 \pm 0.00002$  | $1.6948 \pm 0.0001$ | $8.4 \pm 0.6$ |
| 8 h    | $0.49667 \pm 0.00002$  | $1.6977 \pm 0.0001$ | $5.1 \pm 0.7$ |
| 24 h   | $0.49662 \pm 0.00003$  | $1.6977 \pm 0.0001$ | $4.8 \pm 0.8$ |
| 48 h   | $0.496670 \pm 0.00003$ | $1.6980 \pm 0.0002$ | $4.9 \pm 0.6$ |

**Table SI2.** Maximum compressive strength ( $\sigma_c$ ) and Young's modulus (E) from the compression tests of spines from *P. imperialis* before (A) and after the thermal treatment at 250 °C for 8 hours (B), 24 hours (C) and 48 hours (D). At least 10 specimens were used for each sample set.

| <b>Sample</b> | <b>Time</b> | <b><math>\sigma_c</math></b> | <b>E</b>  |
|---------------|-------------|------------------------------|-----------|
|               | (hours)     | (MPa)*                       | (GPa)*    |
| A             | 0           | 100 ± 20                     | 1.9 ± 0.7 |
| B             | 8           | 120 ± 10                     | 2.1 ± 0.7 |
| C             | 24          | 120 ± 20                     | 1.9 ± 0.4 |
| D             | 48          | 90 ± 20                      | 1.8 ± 0.5 |

\*These differences are not statistically significant.
